# Supplementary material for: A New Identification Method Reveals the Resistance of an Extensive-Source Radish Collection to Plasmodiophora brassicae Race 4
Source: MDPI journal article supplement (doi:10.3390/agronomy11040792), 2021-04-17
Supplement: s1 [file s1]

**Table S1.** Detailed information on the radish accessions that were tested in this study

| Accession                                                          | Cultivar Name          | Source (cities, provinces/countries) | Disease Index <sup>a</sup> | Resistance |
|--------------------------------------------------------------------|------------------------|--------------------------------------|----------------------------|------------|
| <i>Group 1. Cultivars that were collected from North China</i>     |                        |                                      |                            |            |
| CRR1                                                               | Bai pi chang<br>luo bo | Gaoyi, Hebei                         | 89.81±2.33                 | HS         |
| CRR2                                                               | Da hong luo bo         | Tangshan, Hebei                      | 71.23±4.69                 | HS         |
| CRR3                                                               | Da wu ye luo bo        | Weichang, Hebei                      | 67.76±4.54                 | HS         |
| CRR4                                                               | Da wu ye luo bo        | Weichang, Hebei                      | 44.91±3.51                 | S          |
| CRR5                                                               | Liu ying luo bo        | Weichang, Hebei                      | 66.67±2.70                 | HS         |
| CRR6                                                               | Wu qiang qing          | Wuqiang, Hebei                       | 78.52±3.07                 | HS         |
| CRR7                                                               | Xi pi bai luo bo       | Baoding, Hebei                       | 53.09±2.77                 | S          |
| CRR8                                                               | Xiang ya bai           | Zanhuang, Hebei                      | 67.97±1.13                 | HS         |
| CRR9                                                               | Xiang ya bai           | Yuanshi, Hebei                       | 75.33±0.80                 | HS         |
| CRR10                                                              | Xiang ya bai           | Zhaoxian, Hebei                      | 73.81±0.30                 | HS         |
| CRR11                                                              | Zhuo zhou luo bo       | Zhuozhou, Hebei                      | 78.61±5.15                 | HS         |
| CRR12                                                              | Qing luo bo            | Tianjin, Tianjin                     | 89.30±6.43                 | HS         |
| CRR13                                                              | Wei qing               | Tianjin, Tianjin                     | 68.79±4.95                 | HS         |
| CRR14                                                              | Wei qing               | Tianjin, Tianjin                     | 29.53±4.69                 | MR         |
| CRR15                                                              | Xiao wa wa lian        | Tianjin, Tianjin                     | 57.61±4.85                 | S          |
| CRR16                                                              | Xin li mei             | Beijing, Beijing                     | 76.85±0.93                 | HS         |
| CRR17                                                              | Man tang hong          | Beijing, Beijing                     | 54.89±8.60                 | S          |
| CRR18                                                              | Chun zao hong          | Beijing, Beijing                     | 57.67±3.33                 | S          |
| CRR19                                                              | Da hong pao            | Beijing, Beijing                     | 71.34±1.77                 | HS         |
| CRR20                                                              | Xin li mei             | Beijing, Beijing                     | 34.41±4.53                 | S          |
| CRR21                                                              | Bai zui tou            | Hunyuan, Shanxi                      | 57.09±2.17                 | S          |
| CRR22                                                              | Dong bu qiu            | Wenxi, Shanxi                        | 58.67±5.11                 | S          |
| CRR23                                                              | Jiang xian bai         | Jiangxian, Shanxi                    | 85.19±7.41                 | HS         |
| CRR24                                                              | Long ci                | Linfen, Shanxi                       | 44.45±1.12                 | S          |
| CRR25                                                              | Shui luo bo            | Lingqiu, Shanxi                      | 81.77±5.23                 | HS         |
| CRR26                                                              | Shui luo bo            | Puxian, Shanxi                       | 70.53±5.18                 | HS         |
| CRR27                                                              | Bai gu niang           | Quwo, Shanxi                         | 71.65±3.72                 | HS         |
| CRR28                                                              | Bai pi luo bo          | Ruicheng, Shanxi                     | 71.11±6.67                 | HS         |
| CRR29                                                              | Shui luo bo            | Taiyuan, Shanxi                      | 62.91±6.42                 | HS         |
| CRR30                                                              | Shui luo bo            | Changzhi, Shanxi                     | 79.63±4.11                 | HS         |
| CRR31                                                              | Da qing luo bo         | Chifeng, Inner Mongolia              | 47.36±6.55                 | S          |
| CRR32                                                              | Min shui luo bo        | Huhe, Inner Mongolia                 | 76.38±1.88                 | HS         |
| CRR33                                                              | Qing pi cui            | Linxi, Inner Mongolia                | 87.47±3.46                 | HS         |
| CRR34                                                              | Xiang ya bai           | Hangjin, Inner Mongolia              | 82.88±4.98                 | HS         |
| CRR35                                                              | Chang bai luo bo       | Chifeng, Inner Mongolia              | 61.23±7.36                 | HS         |
| <i>Group 2. Cultivars that were collected from Northeast China</i> |                        |                                      |                            |            |
| CRR36                                                              | Xiao hong pao          | Jiangsheng, Heilongjiang             | 54.01±5.52                 | S          |
| CRR37                                                              | Da hong pao            | Jiangwang, Heilongjiang              | 83.67±4.99                 | HS         |
| CRR38                                                              | Tong yuan qing         | Dongfeng, Jilin                      | 54.50±1.28                 | S          |
| CRR39                                                              | Da hong pao            | Changchun, Jilin                     | 85.24±2.64                 | HS         |
| CRR40                                                              | Da hong luo bo         | Yingkou, Liaoning                    | 78.50±2.26                 | HS         |
| CRR41                                                              | Xin li mei             | Nongke, Liaoning                     | 81.60±6.90                 | HS         |
| CRR42                                                              | Da hong pao            | Chaoyang, Liaoning                   | 67.59±3.59                 | HS         |
| CRR43                                                              | Xiao wu ying           | Dalian, Liaoning                     | 70.53±3.71                 | HS         |

*Group 3. Cultivars that were collected from East China*

|       |                  |                     |            |    |
|-------|------------------|---------------------|------------|----|
| CRR44 | Zong yang        | Zongyang, Anhui     | 58.65±1.64 | S  |
| CRR45 | Da qing luo bo   | Shouxian, Anhui     | 59.26±3.32 | S  |
| CRR46 | Da qing luo bo   | Hefei, Anhui        | 75.98±6.23 | HS |
| CRR47 | Da zi luo bo     | Huoqiu, Anhui       | 59.01±4.07 | S  |
| CRR48 | Ding di bai      | Liuan, Anhui        | 64.20±7.84 | HS |
| CRR49 | Ding di bai      | Liuan, Anhui        | 62.16±5.95 | HS |
| CRR50 | Fen jiang        | Huoqiu, Anhui       | 56.28±7.34 | S  |
| CRR51 | Gao chun yuan    | Wuhu, Anhui         | 82.72±4.94 | HS |
| CRR52 | Hen di zuan      | Huoqiu, Anhui       | 60.85±3.82 | HS |
| CRR53 | Hua ye bai       | Shexian, Anhui      | 73.99±2.67 | HS |
| CRR54 | Jiu ying hong    | Huainan, Anhui      | 79.41±4.79 | HS |
| CRR55 | Lu jiang zao     | Lujiang, Anhui      | 0.00±0.00  | I  |
| CRR56 | Qing tou         | Funan, Anhui        | 64.62±4.62 | HS |
| CRR57 | Qing tou nen     | Liuan, Anhui        | 89.89±3.54 | HS |
| CRR58 | Qiu hong luo bo  | Huainan, Anhui      | 62.53±8.64 | HS |
| CRR59 | Shi tai luo bo   | Shitai, Anhui       | 46.91±8.02 | S  |
| CRR60 | Tai ping bai     | Taiping, Anhui      | 52.22±2.88 | S  |
| CRR61 | Tai ping bai     | Taiping, Anhui      | 21.64±7.32 | MR |
| CRR62 | Wu yue hong      | Huainan, Anhui      | 74.44±1.70 | HS |
| CRR63 | Su xian qing     | Suxian, Anhui       | 76.38±4.89 | HS |
| CRR64 | Yi xian hong     | Huaiyuan, Anhui     | 59.79±7.69 | S  |
| CRR65 | Chang feng qing  | Changfeng, Anhui    | 48.09±1.55 | S  |
| CRR66 | Zhi huang        | Shexian, Anhui      | 52.87±5.86 | S  |
| CRR67 | Ya dan qing      | Chaoxian, Anhui     | 76.35±3.64 | HS |
| CRR68 | Da luo bo        | Huoqiu, Anhui       | 74.07±2.62 | HS |
| CRR69 | Sj10Q            | Sheng, Shandong     | 78.70±6.48 | HS |
| CRR70 | Bai luo bo       | Shanghe, Shandong   | 76.67±3.57 | HS |
| CRR71 | Che tou hong     | Xintai, Shandong    | 75.93±5.48 | HS |
| CRR72 | Chuan xin hong   | Cangshan, Shandong  | 61.32±6.59 | HS |
| CRR73 | Chun luo bo      | Qingzhou, Shandong  | 89.20±1.88 | HS |
| CRR74 | Da hong pao      | Danxian, Shandong   | 17.20±2.76 | MR |
| CRR75 | Da hong pao      | Xintai, Shandong    | 75.37±5.52 | HS |
| CRR76 | Da hong pao      | Jiaxiang, Shandong  | 59.96±4.12 | S  |
| CRR77 | Dong ling bai    | Liangshan, Shandong | 80.25±3.49 | HS |
| CRR78 | Fan zhen qing    | Taian, Shandong     | 55.80±0.86 | S  |
| CRR79 | Hong pi luo bo   | Yanzhou, Shandong   | 83.92±3.07 | HS |
| CRR80 | Xin li mei       | Sheng, Shandong     | 38.89±2.70 | S  |
| CRR81 | Xin li mei       | Sheng, Shandong     | 3.65±1.95  | HR |
| CRR82 | Hong xin luo bo  | Taishan, Shandong   | 75.49±1.16 | HS |
| CRR83 | Chuan xin hong   | Yanzhou, Shandong   | 79.63±2.62 | HS |
| CRR84 | Dao ba luo bo    | Jimo, Shandong      | 87.55±7.22 | HS |
| CRR85 | Da hong pao      | Jining, Shandong    | 76.26±2.43 | HS |
| CRR86 | Da hong pao      | Jiaxiang, Shandong  | 76.59±5.48 | HS |
| CRR87 | Hong pi hong xin | Juxian, Shandong    | 78.95±3.51 | HS |
| CRR88 | Wang cheng       | Laixi, Shandong     | 86.67±6.79 | HS |
| CRR89 | Lao shan Qing    | Laoshan, Shandong   | 89.95±1.05 | HS |
| CRR90 | Li jin qing      | Lijin, Shandong     | 77.25±5.03 | HS |
| CRR91 | Peng lai qing pi | Penglai, Shandong   | 71.54±3.95 | HS |
| CRR92 | Qing yuan cui    | Jinan, Shandong     | 6.30±2.52  | R  |

|        |                  |                     |            |    |
|--------|------------------|---------------------|------------|----|
| CRR93  | Qing yuan cui    | Jinan, Shandong     | 86.42±6.87 | HS |
| CRR94  | Da hong pao      | Rushan, Shandong    | 51.19±6.95 | S  |
| CRR95  | Si ying luo bo   | Pingyi, Shandong    | 81.67±3.14 | HS |
| CRR96  | Si shui wu ying  | Sishui, Shandong    | 70.06±8.04 | HS |
| CRR97  | Tian zheng 1hao  | Sheng, Shandong     | 78.02±3.33 | HS |
| CRR98  | Wan yao bai      | Shenxian, Shandong  | 45.56±6.19 | S  |
| CRR99  | Wan yao bai      | Shenxian, Shandong  | 83.87±3.03 | HS |
| CRR100 | Wei xian qing    | Weicheng, Shandong  | 57.70±2.82 | S  |
| CRR101 | Wei xian qing    | Weifang, Shandong   | 53.79±1.25 | S  |
| CRR102 | Wei xian qing    | Weifang, Shandong   | 55.84±6.75 | S  |
| CRR103 | Wu ying han      | Jiaxiang, Shandong  | 76.13±9.70 | HS |
| CRR104 | Lu ba fen        | Wucheng, Shandong   | 64.63±9.07 | HS |
| CRR105 | Xin li mei       | Taishan, Shandong   | 80.74±2.10 | HS |
| CRR106 | Lu tou huang     | Yangxin, Shandong   | 90.61±5.07 | HS |
| CRR107 | Da jian zui      | Yishui, Shandong    | 65.74±6.07 | HS |
| CRR108 | Qing gang        | Yishui, Shandong    | 94.26±2.87 | HS |
| CRR109 | Yi shui qing     | Yishui, Shandong    | 73.50±1.08 | HS |
| CRR110 | Zhu cheng hong   | Zhucheng, Shandong  | 71.98±0.86 | HS |
| CRR111 | Jin ma luo bo    | Zichuan, Shandong   | 87.65±1.75 | HS |
| CRR112 | Qing tou         | Zouxian, Shandong   | 25.57±5.05 | MR |
| CRR113 | Lu ba fen        | Wucheng, Shandong   | 74.64±6.43 | HS |
| CRR114 | Bai yang hua     | Jurong, Jiangsu     | 85.43±1.93 | HS |
| CRR115 | Chun bai luo bo  | Taizhou, Jiangsu    | 90.74±6.68 | HS |
| CRR116 | Da qing luo bo   | Ganyu, Jiangsu      | 79.37±3.85 | HS |
| CRR117 | Da shui luo bo   | Ganyu, Jiangsu      | 48.31±4.95 | S  |
| CRR118 | Da tou hong      | Yangzhou, Jiangsu   | 71.85±3.23 | HS |
| CRR119 | Dang di yan      | Huaiyin, Jiangsu    | 71.08±2.82 | HS |
| CRR120 | Dang di yan      | Huaiyin, Jiangsu    | 49.61±5.78 | S  |
| CRR121 | Fu bai           | Jurong, Jiangsu     | 75.80±5.43 | HS |
| CRR122 | La zhu tai       | Lianyun, Jiangsu    | 58.79±0.61 | S  |
| CRR123 | Liu shi ri       | Rudong, Jiangsu     | 83.33±7.06 | HS |
| CRR124 | Si ji hong       | Nanjing, Jiangsu    | 49.85±6.42 | S  |
| CRR125 | Wu yue hong      | Nanjing, Jiangsu    | 0.31±0.31  | HR |
| CRR126 | Xiao hong luo bo | Changzhou, Jiangsu  | 72.63±2.04 | HS |
| CRR127 | Ya dan tou       | Yangzhou, Jiangsu   | 79.01±7.51 | HS |
| CRR128 | Zao zi bai       | Changzhou, Jiangsu  | 75.06±6.35 | HS |
| CRR129 | Zhe da chang     | Nanjing, Jiangsu    | 17.50±1.23 | MR |
| CRR130 | Zhong qiu hong   | Nanjing, Jiangsu    | 72.02±2.58 | HS |
| CRR131 | Bai shi          | Linhai, Zhejiang    | 63.81±3.66 | HS |
| CRR132 | Zhe da chang     | Hangzhou, Zhejiang  | 80.39±6.50 | HS |
| CRR133 | Zhe da chang     | ZJU, Zhejiang       | 12.95±1.27 | R  |
| CRR134 | Sha bu           | Huangyan, Zhejiang  | 20.83±3.01 | MR |
| CRR135 | Tai hu wan       | Huzhou, Zhejiang    | 54.32±1.55 | S  |
| CRR136 | Deng pao bai     | Tongxiang, Zhejiang | 62.50±2.50 | HS |
| CRR137 | Da ling tou      | Linhai, Zhejiang    | 52.24±1.29 | S  |
| CRR138 | Jin xiang        | Wenzhou, Zhejiang   | 56.87±4.71 | S  |
| CRR139 | Xiao gou bai     | Hangzhou, Zhejiang  | 83.88±4.36 | HS |
| CRR140 | Shang hang       | Shanghang, Fujian   | 27.16±3.27 | MR |
| CRR141 | 100Tian          | Minhou, Fujian      | 52.78±3.99 | S  |
| CRR142 | Yuan tong        | Fuqing, Fujian      | 73.77±4.85 | HS |

|                                                                        |                |                   |            |    |
|------------------------------------------------------------------------|----------------|-------------------|------------|----|
| CRR143                                                                 | Nan qiao       | Ganzhou, Jiangxi  | 12.96±7.65 | R  |
| CRR144                                                                 | Yan zhi        | Ji'an, Jiangxi    | 74.38±3.13 | HS |
| CRR145                                                                 | Tu zhou luo bo | Nanchang, Jiangxi | 59.98±2.42 | S  |
| <i>Group 4. Cultivars that were collected from South Central China</i> |                |                   |            |    |
| CRR146                                                                 | Han luo bo     | Boai, Henan       | 84.20±1.86 | HS |
| CRR147                                                                 | Ban jie qing   | Dengfeng, Henan   | 66.67±6.79 | HS |
| CRR148                                                                 | Lu tou qing    | Dengxian, Henan   | 70.85±1.42 | HS |
| CRR149                                                                 | Huai yang guan | Huaiyang, Henan   | 59.23±7.74 | S  |
| CRR150                                                                 | Pao dan        | Linying, Henan    | 21.63±3.32 | MR |
| CRR151                                                                 | Zhu gan qing   | Lushan, Henan     | 9.90±3.99  | R  |
| CRR152                                                                 | You guan       | Luohe, Henan      | 11.77±4.25 | R  |
| CRR153                                                                 | Lu tou qing    | Miyang, Henan     | 20.71±0.22 | MR |
| CRR154                                                                 | Zhu gan qing   | Minquan, Henan    | 65.26±7.92 | HS |
| CRR155                                                                 | Lu tou qing    | Ningling, Henan   | 13.98±6.46 | R  |
| CRR156                                                                 | Lu tou qing    | Ningling, Henan   | 67.57±6.23 | HS |
| CRR157                                                                 | Qing pi luo bo | Pingyu, Henan     | 73.15±7.04 | HS |
| CRR158                                                                 | Da qing        | Qixian, Henan     | 74.44±1.70 | HS |
| CRR159                                                                 | Pao dan        | Qixian, Henan     | 91.40±4.32 | HS |
| CRR160                                                                 | Pao dan        | Qixian, Henan     | 43.36±9.18 | S  |
| CRR161                                                                 | Yuan ying      | Boai, Henan       | 66.67±6.42 | HS |
| CRR162                                                                 | Da hong pao    | Queshan, Henan    | 80.21±4.22 | HS |
| CRR163                                                                 | Qing tou       | Shangcheng, Henan | 62.02±7.42 | HS |
| CRR164                                                                 | Shui luo bo    | Shangcheng, Henan | 53.70±4.04 | S  |
| CRR165                                                                 | Yuan tou       | Shangcai, Henan   | 56.44±2.94 | S  |
| CRR166                                                                 | Zhu gan qing   | Sheqi, Henan      | 68.89±2.57 | HS |
| CRR167                                                                 | Shi jin bai    | Tangyin, Henan    | 69.65±0.43 | HS |
| CRR168                                                                 | Ban jie hong   | Tanghe, Henan     | 67.41±8.25 | HS |
| CRR169                                                                 | Zhu gan qing   | Tanghe, Henan     | 87.59±6.41 | HS |
| CRR170                                                                 | Zhe da chang   | Zhengzhou, Henan  | 88.42±7.89 | HS |
| CRR171                                                                 | Wu gang guan   | Wugang, Henan     | 70.37±3.04 | HS |
| CRR172                                                                 | Xi hua da qing | Xihua, Henan      | 68.33±6.19 | HS |
| CRR173                                                                 | Qing ba fen    | Xihua, Henan      | 52.94±7.64 | S  |
| CRR174                                                                 | Lu tou qing    | Shiping, Henan    | 72.49±5.82 | HS |
| CRR175                                                                 | Lu tou qing    | Shiping, Henan    | 44.93±2.00 | S  |
| CRR176                                                                 | Lu tou qing    | Xixia, Henan      | 74.07±4.32 | HS |
| CRR177                                                                 | Niu tui        | Xiangxian, Henan  | 81.48±3.70 | HS |
| CRR178                                                                 | Ban jie gang   | Xinzheng, Henan   | 77.16±2.16 | HS |
| CRR179                                                                 | Lu tou qing    | Xinzheng, Henan   | 60.99±1.18 | HS |
| CRR180                                                                 | Ban jie qing   | Xiuyu, Henan      | 32.31±7.27 | S  |
| CRR181                                                                 | Da hong pao    | Yongcheng, Henan  | 84.26±4.58 | HS |
| CRR182                                                                 | Zhu gan qing   | Yuxian, Henan     | 56.05±4.43 | S  |
| CRR183                                                                 | Lu tou qing    | Yuanyang, Henan   | 90.17±2.56 | HS |
| CRR184                                                                 | Jin hua tai    | Zhengzhou, Henan  | 81.36±4.59 | HS |
| CRR185                                                                 | Bai luo bo     | Shennong, Hubei   | 51.23±4.34 | S  |
| CRR186                                                                 | Bai luo bo     | Yichang, Hubei    | 11.11±1.11 | R  |
| CRR187                                                                 | Bai luo bo     | Dongshi, Hubei    | 74.71±5.09 | HS |
| CRR188                                                                 | Bai luo bo     | Dongshi, Hubei    | 69.96±5.54 | HS |
| CRR189                                                                 | Bai luo bo     | Xuandong, Hubei   | 35.77±2.33 | S  |
| CRR190                                                                 | Bai luo bo     | Changyang, Hubei  | 21.98±3.05 | MR |
| CRR191                                                                 | Bai luo bo     | Changyang, Hubei  | 39.07±4.57 | S  |

|                                                                    |                     |                     |            |    |
|--------------------------------------------------------------------|---------------------|---------------------|------------|----|
| CRR192                                                             | Bai luo bo          | Changyang, Hubei    | 60.97±6.34 | HS |
| CRR193                                                             | Bai luo bo          | Wufeng, Hubei       | 65.32±4.48 | HS |
| CRR194                                                             | Cai luo bo          | Fangxian, Hubei     | 63.33±3.96 | HS |
| CRR195                                                             | Hong luo bo         | Dongshi, Hubei      | 72.59±3.23 | HS |
| CRR196                                                             | Hong luo bo         | Dongshi, Hubei      | 28.61±4.43 | MR |
| CRR197                                                             | Hong luo bo         | Lichuan, Hubei      | 76.33±4.07 | HS |
| CRR198                                                             | Hong pi luo bo      | Xiantao, Hubei      | 59.57±1.51 | S  |
| CRR199                                                             | Hua tai             | Dongshi, Hubei      | 62.22±2.00 | HS |
| CRR200                                                             | Huang jin           | Xianfeng, Hubei     | 5.56±5.56  | R  |
| CRR201                                                             | Huang zhou          | Wuhan, Hubei        | 80.56±4.33 | HS |
| CRR202                                                             | Lu tou qing         | Baokang, Hubei      | 16.30±3.63 | MR |
| CRR203                                                             | Pao dan             | Fangxian, Hubei     | 5.98±2.16  | R  |
| CRR204                                                             | Qing tou            | Wuchang, Hubei      | 92.28±2.36 | HS |
| CRR205                                                             | Re luo bo           | Fangxian, Hubei     | 61.80±4.48 | HS |
| CRR206                                                             | Shui luo bo         | Changyang, Hubei    | 21.07±7.70 | MR |
| CRR207                                                             | Wan luo bo          | Wufeng, Hubei       | 42.91±6.42 | S  |
| CRR208                                                             | Xi ma zhuang        | Fangxian, Hubei     | 70.79±5.47 | HS |
| CRR209                                                             | Xia lu              | Sheng, Hubei        | 67.70±7.48 | HS |
| CRR210                                                             | Xiao hong           | Zhushan, Hubei      | 87.30±6.61 | HS |
| CRR211                                                             | Xing shan hong      | Xingshan, Hubei     | 56.79±7.51 | S  |
| CRR212                                                             | Yuan luo bo         | Zigui, Hubei        | 78.40±2.69 | HS |
| CRR213                                                             | Yuan zhui           | Changyang, Hubei    | 78.08±3.51 | HS |
| CRR214                                                             | Yuan zhui           | Fangxian, Hubei     | 37.72±3.84 | S  |
| CRR215                                                             | Yuan zhui           | Zhuxi, Hubei        | 39.20±2.69 | S  |
| CRR216                                                             | Chang tiao          | Zhuxi, Hubei        | 74.19±1.59 | HS |
| CRR217                                                             | Chang tiao          | Shennong, Hubei     | 0.00±0.00  | I  |
| CRR218                                                             | Xin tian da bai     | Xintian, Hunan      | 74.07±5.66 | HS |
| CRR219                                                             | Sha guan zi         | Shaoyang, Hunan     | 65.43±7.51 | HS |
| CRR220                                                             | Yuan luo bo         | Changsha, Hunan     | 58.15±3.16 | S  |
| CRR221                                                             | Yuan luo bo         | Ningyuan, Hunan     | 0.00±0.00  | I  |
| CRR222                                                             | Hong pi luo bo      | Xiangxi, Hunan      | 71.36±4.39 | HS |
| CRR223                                                             | Jin xian diao hu lu | Linxiang, Hunan     | 72.05±3.25 | HS |
| CRR224                                                             | Sheng tong          | Changsha, Hunan     | 31.97±3.57 | S  |
| CRR225                                                             | Nan pan zhou        | Chenghai, Guangdong | 82.72±4.90 | HS |
| CRR226                                                             | Bai yu wan          | Chenghai, Guangdong | 89.21±2.23 | HS |
| CRR227                                                             | Bai sha dong ye     | Chenghai, Guangdong | 56.69±4.38 | S  |
| CRR228                                                             | Niu tui             | Yulin, Guangxi      | 21.93±2.52 | MR |
| CRR229                                                             | Nan pan zhou        | Beiliu, Guangxi     | 77.40±4.17 | HS |
| <i>Group 5. Cultivars that were collected from Southwest China</i> |                     |                     |            |    |
| CRR230                                                             | Bai da              | Youyang, Sichuan    | 11.88±7.96 | R  |
| CRR231                                                             | Bai luo bo          | --, Sichuan         | 43.66±4.47 | S  |
| CRR232                                                             | Bai luo bo          | --, Sichuan         | 80.01±4.14 | HS |
| CRR233                                                             | Ban tou hong        | Ya'an, Sichuan      | 21.85±1.93 | MR |
| CRR234                                                             | Chi luo bo          | Liangping, Sichuan  | 80.11±7.24 | HS |
| CRR235                                                             | Chu yang            | --, Sichuan         | 65.33±3.97 | HS |
| CRR236                                                             | Chu yang            | --, Sichuan         | 14.10±5.73 | R  |
| CRR237                                                             | Da yuan             | Xingwen, Sichuan    | 87.09±5.50 | HS |
| CRR238                                                             | Dong luo bo         | Wushan, Sichuan     | 64.14±1.62 | HS |
| CRR239                                                             | Fen tuan            | Hanyuan, Sichuan    | 75.95±5.21 | HS |
| CRR240                                                             | Hong xian           | Hongxian, Sichuan   | 0.00±0.00  | I  |

|        |                 |                    |            |    |
|--------|-----------------|--------------------|------------|----|
| CRR241 | Guan zi         | --, Sichuan        | 22.22±2.49 | MR |
| CRR242 | Hong luo bo     | Wuxi, Sichuan      | 54.14±3.14 | S  |
| CRR243 | Jin tiao zi     | Luzhou, Sichuan    | 68.21±4.79 | HS |
| CRR244 | Hong pi luo bo  | Fengdong, Sichuan  | 57.41±4.14 | S  |
| CRR245 | Hong pi luo bo  | Pengshan, Sichuan  | 73.95±6.09 | HS |
| CRR246 | Hong pi luo bo  | Dazu, Sichuan      | 61.73±1.97 | HS |
| CRR247 | Hong pi yuan    | Quxian, Sichuan    | 43.90±5.47 | S  |
| CRR248 | Hong sha guo    | Jiangjin, Sichuan  | 35.34±4.30 | S  |
| CRR249 | Man shen hong   | Chengdong, Sichuan | 97.04±2.96 | HS |
| CRR250 | Mei zi luo bo   | Fengjie, Sichuan   | 65.26±1.84 | HS |
| CRR251 | Pi pa ying      | Mianyang, Sichuan  | 51.32±1.09 | S  |
| CRR252 | Qing luo bo     | Fengjie, Sichuan   | 15.28±1.79 | MR |
| CRR253 | Qing pi gua     | Quxian, Sichuan    | 32.01±4.28 | S  |
| CRR254 | Tie gan zi      | Pixian, Sichuan    | 65.14±4.17 | HS |
| CRR255 | Tuan luo bo     | Fengdong, Sichuan  | 20.50±2.58 | MR |
| CRR256 | Yuan tou        | Fengdong, Sichuan  | 5.29±5.29  | R  |
| CRR257 | Yuan luo bo     | Fengdong, Sichuan  | 84.02±2.46 | HS |
| CRR258 | Yuan luo bo     | Fengdong, Sichuan  | 82.72±3.27 | HS |
| CRR259 | Pi pa ye        | Pengxian, Sichuan  | 88.27±0.62 | HS |
| CRR260 | Ban tou hong    | Yaan, Sichuan      | 69.04±8.15 | HS |
| CRR261 | Qing chang      | Nanchong, Sichuan  | 5.76±5.76  | R  |
| CRR262 | Yuan bai        | Xichong, Sichuan   | 45.93±5.34 | S  |
| CRR263 | Yuan bai        | Neijiang, Sichuan  | 66.57±3.06 | HS |
| CRR264 | Qing tou        | Ya'an, Sichuan     | 14.48±3.52 | R  |
| CRR265 | Qing tou        | Ya'an, Sichuan     | 79.42±1.65 | HS |
| CRR266 | Da yuan         | Xingwen, Sichuan   | 73.71±0.92 | HS |
| CRR267 | Hong pi         | Pengshan, Sichuan  | 5.70±3.21  | R  |
| CRR268 | Ban tou hong    | Pixian, Sichuan    | 86.15±1.62 | HS |
| CRR269 | Bai da luo bo   | Beichuan, Sichuan  | 43.59±2.22 | S  |
| CRR270 | Hong sha guo    | Jiangjin, Sichuan  | 83.92±6.18 | HS |
| CRR271 | Luo bo          | Xuanhan, Sichuan   | 22.90±7.63 | MR |
| CRR272 | Piao dong       | Jiangan, Sichuan   | 29.47±4.61 | MR |
| CRR273 | Shuang dian     | Fengjie, Sichuan   | 40.62±2.68 | S  |
| CRR274 | Yuan luo bo     | Wushan, Sichuan    | 0.00±0.00  | I  |
| CRR275 | Ma zhuang       | Yuexi, Sichuan     | 71.08±6.88 | HS |
| CRR276 | Tong guan       | Huili, Sichuan     | 78.57±3.22 | HS |
| CRR277 | Chi yuan gen    | Wenjiang, Sichuan  | 62.13±7.89 | HS |
| CRR278 | Ban shen hong   | Mianning, Sichuan  | 39.11±1.01 | S  |
| CRR279 | Shui jin luo bo | Ziyang, Sichuan    | 81.48±0.74 | HS |
| CRR280 | 60zao luo bo    | Leshan, Sichuan    | 72.96±4.81 | HS |
| CRR281 | Yan zhi hong    | Fuling, Sichuan    | 0.00±0.00  | I  |
| CRR282 | Ban jie hong    | Kunming, Yunnan    | 12.87±6.87 | R  |
| CRR283 | Chun zi luo bo  | Gejiu, Yunnan      | 56.54±3.46 | S  |
| CRR284 | Chun zi luo bo  | Gejiu, Yunnan      | 89.14±5.50 | HS |
| CRR285 | Dong luo bo     | Xuanwei, Yunnan    | 82.41±1.19 | HS |
| CRR286 | Shui luo bo     | Midong, Yunnan     | 73.09±4.69 | HS |
| CRR287 | Si ji bai       | Kunming, Yunnan    | 61.11±3.21 | HS |
| CRR288 | Suan pan zi     | Kaiyuan, Yunnan    | 78.70±0.93 | HS |
| CRR289 | Xiang ya        | Huize, Yunnan      | 36.67±5.41 | S  |
| CRR290 | Xiang ya        | Huize, Yunnan      | 19.57±2.52 | MR |

|        |                     |                     |            |    |
|--------|---------------------|---------------------|------------|----|
| CRR291 | Yan zhi             | Anshun, Guizhou     | 73.52±3.40 | HS |
| CRR292 | Yan zhi             | Si'nan, Guizhou     | 73.03±1.04 | HS |
| CRR293 | Dan zhai ma zhuang  | --, Guizhou         | 67.71±6.05 | HS |
| CRR294 | Hong pi ma zhuang-1 | Jinsha, Guizhou     | 75.54±7.62 | HS |
| CRR295 | Hong pi ma zhuang-4 | Jinsha, Guizhou     | 31.81±7.39 | S  |
| CRR296 | Sha guan            | Zun'yi, Guizhou     | 86.67±7.14 | HS |
| CRR297 | La sa da luo bo     | Lasa, Tibet         | 0.00±0.00  | I  |
| CRR298 | Cui xue             | Geleshan, Chongqing | 84.36±7.85 | HS |

*Group 6. Cultivars that were collected from Northwest China*

|        |                     |                              |            |    |
|--------|---------------------|------------------------------|------------|----|
| CRR299 | Bao ji hong         | Baoji, Shanxi                | 66.05±5.27 | HS |
| CRR300 | Chun bu lao         | Hanzhong, Shaanxi            | 6.58±3.51  | R  |
| CRR301 | Hong pi dong        | Ningqiang, Shaanxi           | 69.84±4.76 | HS |
| CRR302 | Hong re             | Lanzhou, Shaanxi             | 77.78±0.00 | HS |
| CRR303 | Lan tian cheng chui | Lantian, Shaanxi             | 68.43±5.35 | HS |
| CRR304 | Qian yang hong pi   | Qianyang, Shaanxi            | 64.35±6.20 | HS |
| CRR305 | Qing feng-1         | NWAFU <sup>b</sup> , Shaanxi | 42.18±4.79 | S  |
| CRR306 | Qing feng-2         | NWAFU <sup>b</sup> , Shaanxi | 72.99±5.23 | HS |
| CRR307 | Lu tou qing         | Shangxian, Shaanxi           | 40.18±2.42 | S  |
| CRR308 | Lu tou qing         | Shangxian, Shaanxi           | 67.63±4.06 | HS |
| CRR309 | Xi xiang shan       | Xixiang, Shaanxi             | 74.07±3.06 | HS |
| CRR310 | Xi xiang shan       | Xixiang, Shaanxi             | 12.92±0.95 | R  |
| CRR311 | Xi ma zhuang        | Ankang, Shaanxi              | 30.69±2.64 | S  |
| CRR312 | Bai dan zi          | Wulu, Xinjiang               | 88.89±3.70 | HS |
| CRR313 | Da bai dan zi       | Kashi, Xinjiang              | 71.24±3.90 | HS |
| CRR314 | Hong dan zi         | Kashi, Xinjiang              | 3.70±3.70  | HR |
| CRR315 | Hong dan zi         | Wuxian, Xinjiang             | 77.23±2.76 | HS |
| CRR316 | Shui luo bo         | Yumin, Xinjiang              | 56.30±2.41 | S  |
| CRR317 | Xin li mei          | Shihezi, Xinjiang            | 68.90±5.44 | HS |
| CRR318 | Xin sheng 1hao      | Shihezi, Xinjiang            | 70.88±1.49 | HS |
| CRR319 | Gou tou guan        | Pingliang, Gansu             | 79.90±3.69 | HS |
| CRR320 | Bai yuan dan        | Minqin, Gansu                | 78.92±2.72 | HS |
| CRR321 | Zheng ning re       | Zhengning, Gansu             | 53.12±6.27 | S  |
| CRR322 | Jin ta dong         | Jinta, Gansu                 | 86.79±1.52 | HS |
| CRR323 | Niu jiao hua ye     | Guyuan, Ningxia              | 40.12±5.76 | S  |
| CRR324 | Hong bang zi        | Yinchuan, Ningxia            | 54.84±4.87 | S  |
| CRR325 | Ban ye bai          | Zhongning, Ningxia           | 67.92±3.68 | HS |
| CRR326 | Hua ye bai          | Zhongning, Ningxia           | 63.58±5.51 | HS |
| CRR327 | Hong dan dan        | Zhongwei, Ningxia            | 32.69±4.58 | S  |
| CRR328 | Ge dong mu          | Gedong, Qinghai              | 72.38±2.01 | HS |

*Group 7. Cultivars that were collected from other countries*

|        |                  |             |            |    |
|--------|------------------|-------------|------------|----|
| CRR329 | Qiu jie          | Japan       | 76.85±6.07 | HS |
| CRR330 | Shan tian da gen | Japan       | 0.00±0.00  | I  |
| CRR331 | Ying dao da wan  | Japan       | 0.00±0.00  | I  |
| CRR332 | Yi zhe heng ding | Japan       | 9.60±2.49  | R  |
| CRR333 | Zyz-89           | Spain       | 3.70±1.85  | HR |
| CRR334 | Bgv001198        | Spain       | 1.85±1.85  | HR |
| CRR335 | Bgv001199        | Spain       | 10.00±4.21 | R  |
| CRR336 | Hukyopkuwolmun   | North Korea | 15.28±1.24 | MR |
| CRR337 | Hukyopkuwolmun   | North Korea | 64.13±1.55 | HS |
| CRR338 | Chongpimun       | North Korea | 6.42±3.24  | R  |

|        |                |             |            |    |
|--------|----------------|-------------|------------|----|
| CRR339 | Chongpimun     | North Korea | 53.07±2.16 | S  |
| CRR340 | Xia bai yu     | South Korea | 0.00±0.00  | I  |
| CRR341 | Bai guang chun | South Korea | 0.00±0.00  | I  |
| CRR342 | Han guo luo bo | South Korea | 0.00±0.00  | I  |
| CRR343 | Xin bai yu     | South Korea | 66.46±1.04 | HS |
| CRR344 | 4r -x11        | Russia      | 55.80±1.48 | S  |
| CRR345 | Тожев          | Russia      | 63.36±5.83 | HS |
| CRR346 | Валланте       | Russia      | 0.00±0.00  | I  |
| CRR347 | Саша           | Russia      | 18.33±5.34 | MR |
| CRR348 | 5R             | Russia      | 0.00±0.00  | I  |
| CRR349 | Oil radish     | Germany     | 0.00±0.00  | I  |

*Cultivar 791 used as susceptible controls*

|                 |     |                  |            |    |
|-----------------|-----|------------------|------------|----|
| S <sub>CK</sub> | 791 | Zhengzhou, Henan | 90.53±3.66 | HS |
|-----------------|-----|------------------|------------|----|

<sup>a</sup>Means the average DI of three replicates, ± followed by standard error

<sup>a</sup>Means Northwest A&F University
